# Supplementary material
Source: Springer Nature journal article supplement (https://www.springermedizin.de/resource/supplementary/12967_2011_846_MOESM1_ESM.pdf/9577192)

**A**

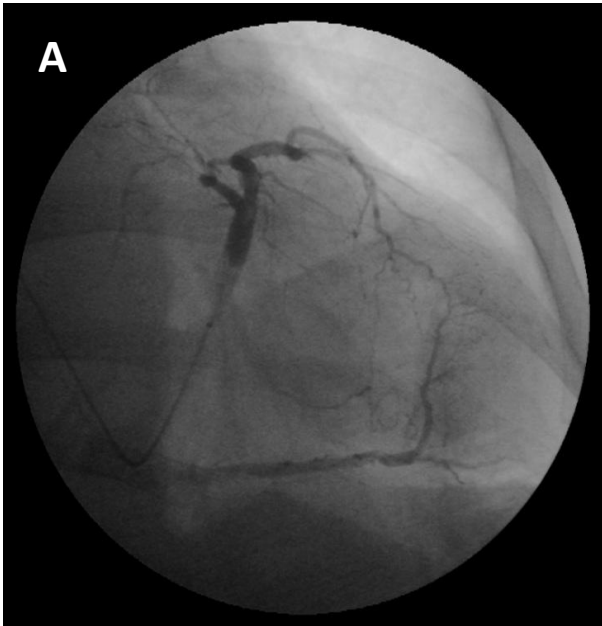

**B**

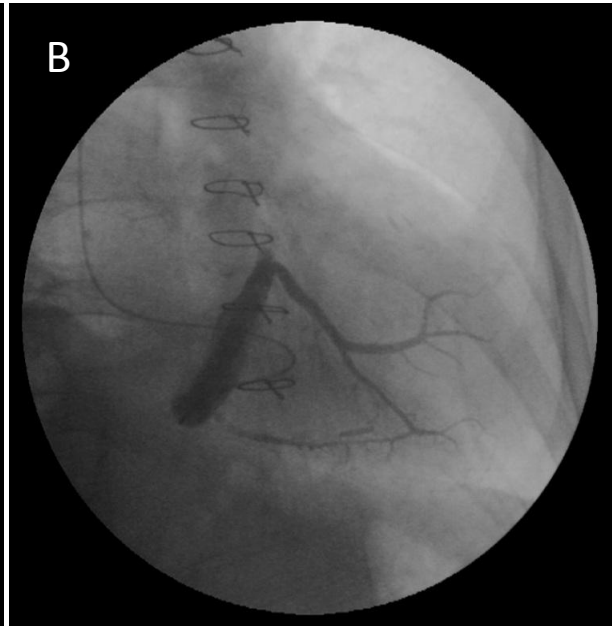

Supplement: MOESM1 [file 9577192]
